# Supplementary material for: Diverse pathways of escape from all well-characterized VRC01-class broadly neutralizing HIV-1 antibodies
Source: PubMed Central journal article supplement (PMC6117093; doi:10.1371/journal.ppat.1007238), 2018-08-20

**A**

|       | Loop D      | V5               |            |
|-------|-------------|------------------|------------|
| ADA   | 274         | 284              | 455        |
| (WT): | SSNFTDNAKNI | TRDGGTNSGSEIFRPG | % of total |
| #1    | --A-DGR--   | ---S-DTR---      | 1.07       |
| #2    | --T-A-G---  | ---AS---L---     | 0.28       |
| #3    | --T-A-G---  | ---T-----        | 0.27       |
| #4    | -GDS-G---   | ---D-T-----      | 0.27       |
| #5    | --KL-DG---  | ---AS---L---     | 3.13       |
| #6    | ---MG-G---  | ---W-H-F---      | 0.22       |
| #7    | ---GED---   | ---C-N-----      | 0.60       |
| #8    | --D-ED---   | ---AS---L---     | 0.19       |
| #9    | -NGL-Y-R-   | ---T-----        | 0.19       |
| #10   | -GDS-G---   | ---C-N-----      | 0.38       |
| #11   | --S-E-G-I-  | ---AS---L---     | 0.75       |
| #12   | --TY-GSGR-  | ---T-----        | 0.36       |
| #13   | --K-D---    | ---R-KS-----     | 0.17       |
| #14   | ---GY---    | ---T-----        | 0.52       |
| #15   | --K-E---    | ---IA-----       | 0.17       |
| #16   | ---VVH---   |                  | 0.84       |
| #17   | --TL-G---   | ---R-K-----      | 0.17       |
| #18   | --S-E-G-I-  | ---K-R-F-----    | 0.47       |
| #19   | ---A-DGR--  | ---AS---L---     | 0.16       |
| #20   | --S-E-G-I-  | ---W-H-F---      | 0.16       |
| #21   | -GDS-G---   | ---T---L---      | 0.62       |
| #22   | -GDS-G---   | ---AS---L---     | 0.73       |
| #23   | --S-GAT---  |                  | 0.58       |
| #24   | A-S-P-D---  |                  | 0.29       |
| #25   | ---I-Y---   | ---R-KS-----     | 0.72       |
| #26   | --S-E-G-I-  | ---S---T---      | 1.95       |
| #27   | -GDS-G---   | ---V-I-----      | 0.14       |
| #28   | -GDS-G---   | ---T-----        | 2.03       |
| #29   | -GDAKNIIVQL | ---T-----        | 0.13       |
| #30   | ---M-DG---  | ---T-----        | 0.13       |
| #31   | --S-E-G-I-  | ---C-N-----      | 0.39       |
| #32   | -GDS-G---   | ---E-D---V---    | 0.13       |
| #33   | ---GY---    | ---K-R-F-----    | 1.00       |
| #34   | -GDS-G---   | ---W-H-F---      | 0.12       |
| #35   | --KL-DG---  | ---T-----        | 0.24       |
| #36   | ---GED---   | ---AS---L---     | 0.12       |
| #37   | --S-E-G-I-  | ---S-DTR-----    | 0.23       |
| #38   | --SLSG-G--- | S-----P---       | 0.77       |
| #39   | --S-E-G-I-  | ---V-I-----      | 0.11       |
| #40   | ---GED---   | ---T-----        | 0.11       |
| #41   | ---GY---    | ---AS---L---     | 0.21       |
| #42   | --D-ED---   | ---T-----        | 0.73       |
| #43   | --KL-DG---  | ---K-R-F-----    | 0.10       |
| #44   | ---GY---    | ---C-N-----      | 0.10       |
| #45   | ---A-DGR--  | ---T-----        | 0.10       |
| #46   | --S-E-G-I-  | ---E-D---V---    | 0.10       |
| #47   | ---M-DG---  | ---E-D---V---    | 0.71       |
| #48   | --T-H-Q---  | ---P-R-----      | 0.10       |
| #49   | -GDS-G---   | ---S-T-----      | 0.29       |
| #50   | --S-E-G-I-  | ---T-----        | 0.63       |

|       | Loop D       | V5               |            |
|-------|--------------|------------------|------------|
| ADA   | 274          | 284              | 455        |
| (WT): | SSNFTDNAKNI  | TRDGGTNSGSEIFRPG | % of total |
| #51   | --DS-G-G---  | ---T-----        | 0.35       |
| #52   | ---SLSG-G--- |                  | 0.96       |
| #53   | --KL-DG---   | ---S---T---      | 0.09       |
| #54   | --K-ET-GS-   |                  | 0.26       |
| #55   | --D-DG---    | ---R-K-----      | 0.26       |
| #56   | ---EEDG---   |                  | 0.09       |
| #57   | -G---Y-T---  | ---T-----        | 0.08       |
| #58   | --KL-DG---   | ---S-DTR-----    | 0.08       |
| #59   | P-I-GG-V---  |                  | 0.08       |
| #60   | --RK-D-S---  |                  | 0.17       |
| #61   | ---RP---     |                  | 0.08       |
| #62   | -GDS-G---    | ---S---T---      | 0.16       |
| #63   | --S-E-G-I-   | S-----P---       | 0.08       |
| #64   | ---M-DG---   | ---C-N-----      | 0.08       |
| #65   | --DS-G-G---  | ---AS---L---     | 0.08       |
| #66   | ---M-DG---   | ---AS---L---     | 0.16       |
| #67   | --KL-DG---   | ---R-K-----      | 0.08       |
| #68   | --D-ED---    | ---K-R-F-----    | 0.07       |
| #69   | --KL-DG---   | ---C-N-----      | 0.14       |
| #70   | --DS-G-G---  | ---V-----        | 0.21       |
| #71   | ---PG-G---   |                  | 0.42       |
| #72   | ---VVH---    | ---AS---L---     | 0.07       |
| #73   | --KV-D---    |                  | 2.46       |
| #74   | -GDS-G---    | ---R-K-----      | 0.21       |
| #75   | ---GED---    |                  | 0.90       |
| #76   | --T-A-G---   | ---C-N-----      | 0.14       |
| #77   | --S-E-G-I-   |                  | 5.90       |
| #78   | --D-ED---    | ---A-G-A-----    | 0.14       |
| #79   | ---GY---     | ---S---T---      | 0.07       |
| #80   | -GDS-G---    | ---P-N-V--T---   | 0.07       |
| #81   | --KL-DG---   | ---W-H-F---      | 0.07       |
| #82   | --SLSG-G---  | ---AS---L---     | 0.13       |
| #83   | ---SLSG-G--- | ---C-N-----      | 0.07       |
| #84   | -GDS-G---    | ---S-DTR-----    | 0.26       |
| #85   | -GDL-G-G-S-  |                  | 0.91       |
| #86   | --KV-D---    | ---K-R-F-----    | 0.06       |
| #87   | ---M-DG---   |                  | 0.70       |
| #88   | --I-Y---     | ---T-----        | 0.06       |
| #89   | --D-ED---    | ---S-DTR-----    | 0.06       |
| #90   | ---M-DG---   | ---K-R-F-----    | 0.06       |
| #91   | -GDLAH---    | ---AS---L---     | 0.06       |
| #92   | ---SAD-R---  | ---WAS-----      | 0.12       |
| #93   | --D-ED---    | ---S---T---      | 0.06       |
| #94   | --T-A-G---   | ---W-H-F---      | 0.06       |
| #95   | --SLSG-G---  | ---T-----        | 0.12       |
| #96   | -GDS-G---    | ---K-R-F-----    | 0.42       |
| #97   | --K-DG---    | ---AS---L---     | 0.12       |
| #98   | ---A-DGR--   |                  | 0.53       |
| #99   | --KV-D---    | ---T-----        | 0.17       |
| #100  | -GDS-G---    |                  | 3.06       |

|       | Loop D       | V5               |            |
|-------|--------------|------------------|------------|
| ADA   | 274          | 284              | 455        |
| (WT): | SSNFTDNAKNI  | TRDGGTNSGSEIFRPG | % of total |
| #101  | -GDS-G---    | ---M-----        | 0.17       |
| #102  | --T-A-G---   |                  | 3.78       |
| #103  | --KV-D---    | ---S---T---      | 0.06       |
| #104  | --KL-DG---   | ---R-KS-----     | 0.06       |
| #105  | ---S-E-G-I-  | ---R-K-----      | 0.28       |
| #106  | ---S---R-T-  | ---R-I-----      | 0.05       |
| #107  | --SI-D---    | ---W---D---      | 0.06       |
| #108  | --S-GAT---   | ---AS---L---     | 0.05       |
| #109  | A-S-P-D---   | ---AS---L---     | 0.05       |
| #110  | --S-E-G-I-   | ---D-----        | 0.11       |
| #111  | --SI-D---    | ---M-----        | 0.16       |
| #112  | ---GY---     | ---P-R-----      | 0.05       |
| #113  | ---GY---     | ---E-D---V---    | 0.05       |
| #114  | --KV-D---    | ---AS---L---     | 0.21       |
| #115  | ---AED---    | ---AS---L---     | 0.05       |
| #116  | --K-DG---    | ---C-N-----      | 0.05       |
| #117  | --D-ED---    | ---C-N-----      | 0.10       |
| #118  | ---AED---    | ---T-----        | 0.05       |
| #119  | --S-H---     | ---D-----        | 0.05       |
| #120  | --TY-GSGR-   | ---T---L---      | 0.05       |
| #121  | --D-ED---    | ---P-R-----      | 0.05       |
| #122  | ---GED---    | ---K-R-F-----    | 0.10       |
| #123  | --T-A-G---   | ---K-R-F-----    | 0.10       |
| #124  | A-R-KGH---   |                  | 0.10       |
| #125  | -GDLAH---    | ---T-----        | 0.15       |
| #126  | ---MG-G---   |                  | 0.10       |
| #127  | ---SLSG-G--- | ---K-R-F-----    | 0.05       |
| #128  | ---M-DG---   | ---S-DTR-----    | 0.05       |
| #129  | ---A-G-T-    | ---V-I-----      | 0.05       |
| #130  | -GYY-D---    |                  | 0.05       |
| #131  | ---AED---    | ---D-YN-----     | 0.05       |
| #132  | ---A-DGR--   | ---K-R-F-----    | 0.05       |
| #133  | ---EA-R---   |                  | 0.05       |
| #134  | --D-ED---    |                  | 1.19       |
| #135  | --D-ED---    | ---R-K-----      | 0.05       |
| #136  | -GDLAH---    |                  | 0.47       |
| #137  | --D-ED---    | ---R-----        | 0.05       |
| #138  | ---A-DGR--   | ---R-K-----      | 0.05       |
| #139  | --DS-G-G---  |                  | 0.37       |
| #140  | --KL-DG---   |                  | 1.26       |
| #141  | --K-ET-GS-   | ---V-I-----      | 0.05       |
| #142  | ---GY---     |                  | 1.22       |
| #143  | ---GY---     | ---W-H-F---      | 0.04       |
| #144  | -GDS-G---    | ---P-T-V-----    | 0.04       |
| #145  | ---SI-D---   |                  | 0.13       |
| #146  | --K-DG---    | ---T-----        | 0.09       |
| #147  | --S-K-G-I-   |                  | 0.04       |
| #148  | -GDL-G-G-S-  | ---C-N-----      | 0.04       |
| #149  | --T-H-Q---   |                  | 0.13       |
| #150  | -GDL-G-G-S-  | ---AS---L---     | 0.08       |

**B**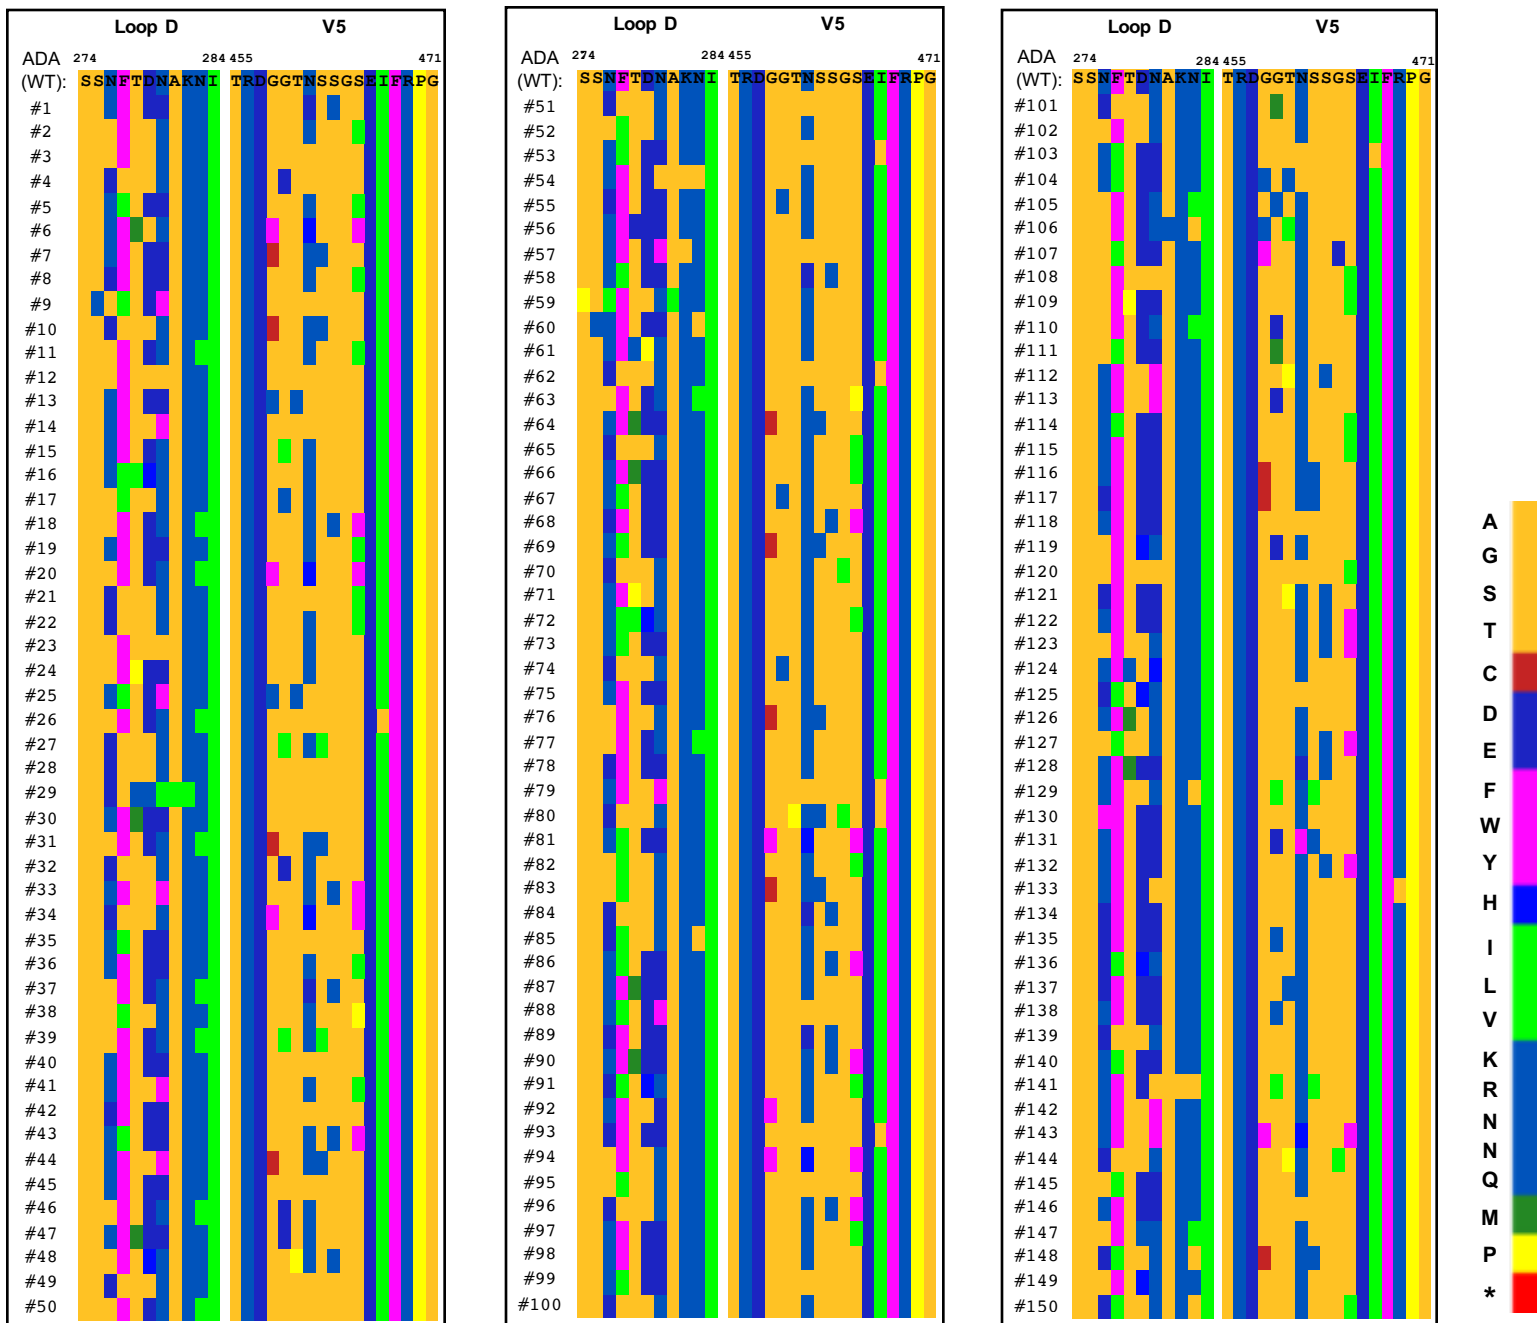

Supplement: ppat.1007238.s003.pdf [file ppat.1007238.s003.pdf]
